# Supplementary material for: Human umbilical cord mesenchymal stem cells regulate immunoglobulin a secretion and remodel the diversification of intestinal microbiota to improve colitis
Source: PubMed Central journal article supplement (PMC9478446; doi:10.3389/fcimb.2022.960208), 2022-09-02
Supplement: DataSheet_1.pdf [file DataSheet_1.pdf]

## Supplementary Material

A

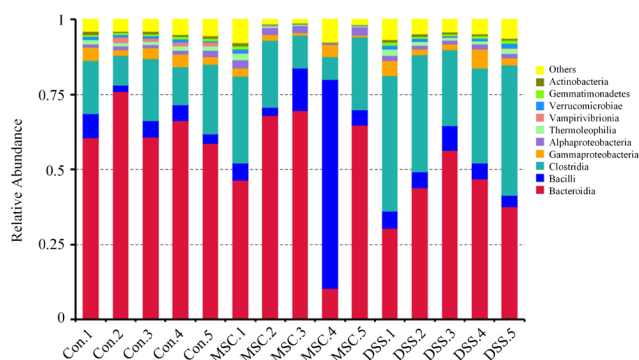

B

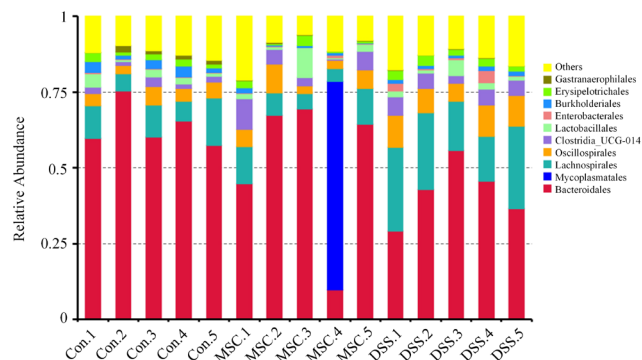

C

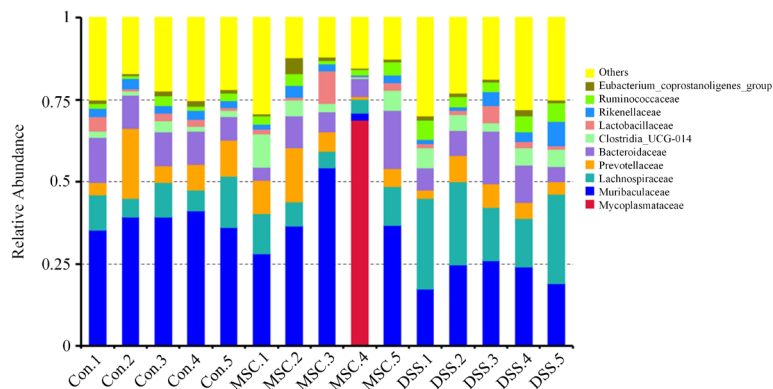

**Supplementary Figure 1.** HUMSCs treatment restored microbial population and abundance in mice induced with DSS. Histograms of relative abundance for top 10 microbes at the class (A), order (B) and family (C) level.

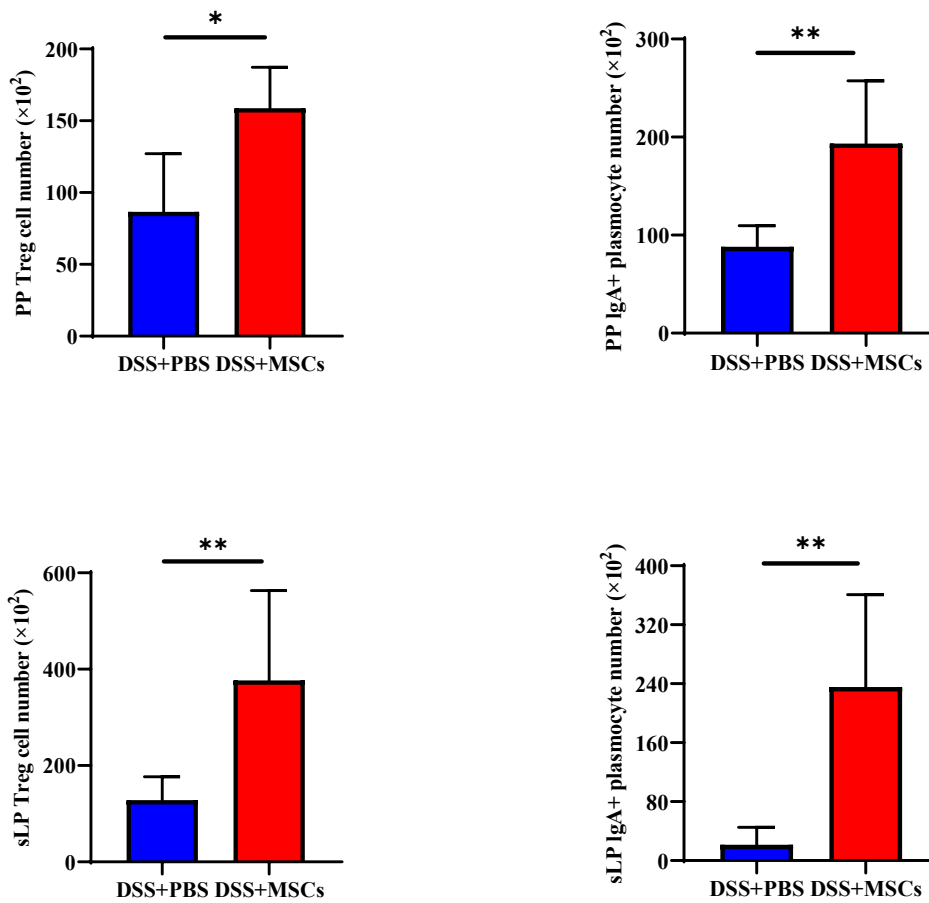

**Supplementary Figure 2.** HUMSCs upregulated the absolute number of Foxp3<sup>+</sup>Tregs and IgA-secreting plasmacytes in PPs and sLP. Bar charts of the number of Foxp3<sup>+</sup>Tregs and IgA<sup>+</sup> plasmacytes in PPs (A) and sLP (B). Data were shown as mean  $\pm$  SD; n=4-5 per group. *P* values were calculated by an unpaired two-tailed Student's t-test, \* *p* < 0.05, \*\* *p* < 0.01, \*\*\* *p* < 0.001.
